# Supplementary material for: Methotrexate effects on adenosine receptor expression in peripheral monocytes of persons with type 2 diabetes and cardiovascular disease
Source: HighWire-hosted journal article supplement (doi:10.1136/jim-2022-002355), 2022-05-23
Supplement: jim-2022-002355supp001_data_supplement.pdf [file jim-2022-002355supp001_data_supplement.pdf]

**Supplemental Table 1.** Subject Demographic Information

| <b>Characteristic</b>   | <b>Treatment</b> | <b>Placebo</b> |
|-------------------------|------------------|----------------|
| Male                    | 9 (90%)          | 9 (90%)        |
| Female                  | 1 (10%)          | 1 (10%)        |
| Caucasian               | 9 (90%)          | 8 (80%)        |
| African American (male) | 1 (10%)          | 2 (20%)        |
| Age (years) $\pm$ SD    | 61.7 $\pm$ 12    | 68.1 $\pm$ 5   |

<sup>1</sup> SD = standard deviation.
